# Supplementary material
Source: MDPI journal article supplement (https://www.mdpi.com/2073-4395/12/9/2016)
Supplement: s1 [file s1]

**Supplementary Table S1.** List of *Brassica oleracea* cultivars included in the study of the biochemical profile.

| <b>Morphotype code</b> | <b>Accession</b>  | <b>Species</b>                                           | <b>Origin</b>         | <b>Collection</b> |
|------------------------|-------------------|----------------------------------------------------------|-----------------------|-------------------|
| <b>BH</b>              | HRIGRU4302        | <i>B. oleracea</i> var. <i>acephala</i>                  | HRI                   | HRI               |
| <b>BR 1</b>            | UNICT568 BR 29    | <i>B. oleracea</i> var. <i>italica</i>                   | CT                    | UNICT             |
| <b>BR 2</b>            | UNICT 3890 BR 41  | <i>B. oleracea</i> var. <i>italica</i>                   | Asa                   | UNICT             |
| <b>BR 3</b>            | UNICT 5109 BR 370 | <i>B. oleracea</i> var. <i>italica</i>                   | CHINA                 | CHINA             |
| <b>BR 4</b>            | UNICT 5106 BR 367 | <i>B. oleracea</i> var. <i>italica</i>                   | CHINA                 | CHINA             |
| <b>BR 5</b>            | HRIGRU5416        | <i>B. oleracea</i> var. <i>italica</i>                   | HRI                   | HRI               |
| <b>BTR</b>             | HRIGRU4690        | <i>B. oleracea</i> <i>trunchuda</i>                      | HRI                   | HRI               |
| <b>BU</b>              | UNICT 3406 BU 19  | <i>B. rupestris</i>                                      | PAZZANO               | UNICT             |
| <b>CC</b>              | CRI09H1800149     | <i>B. oleracea</i> var. <i>capitata</i>                  | SLO                   | PRAGA             |
| <b>CI 1</b>            | UNICT5041         | <i>B. oleracea</i> var. <i>botrytis</i> x <i>italica</i> | Monsampolo del Tronto | CREA-UNICT        |
| <b>CI 2</b>            | UNICT5042         | <i>B. oleracea</i> var. <i>botrytis</i> x <i>italica</i> | Monsampolo del Tronto | CREA-UNICT        |
| <b>CI 3</b>            | UNICT5044         | <i>B. oleracea</i> var. <i>botrytis</i> x <i>italica</i> | Monsampolo del Tronto | CREA-UNICT        |
| <b>CI 4</b>            | UNICT5046         | <i>B. oleracea</i> var. <i>botrytis</i> x <i>italica</i> | Monsampolo del Tronto | CREA-UNICT        |
| <b>CI 5</b>            | UNICT5050         | <i>B. oleracea</i> var. <i>botrytis</i> x <i>italica</i> | Monsampolo del Tronto | CREA-UNICT        |
| <b>CI 6</b>            | UNICT5051         | <i>B. oleracea</i> var. <i>botrytis</i> x <i>italica</i> | Monsampolo del Tronto | CREA-UNICT        |
| <b>CI 7</b>            | UNICT5052         | <i>B. oleracea</i> var. <i>botrytis</i> x <i>italica</i> | Monsampolo del Tronto | CREA-UNICT        |
| <b>CR</b>              | CRI09H2200006     | <i>B. oleracea</i> var. <i>gongylodes</i>                | CSK                   | VURV              |
| <b>CV 1</b>            | UNICT5071 Auto12  | <i>B. oleracea</i> var. <i>botrytis</i>                  | Monsampolo del Tronto | CREA-UNICT        |
| <b>CV 2</b>            | UNICT 5098 CV 238 | <i>B. oleracea</i> var. <i>botrytis</i>                  | TUNISIA               | TUNISIA           |
| <b>CV 3</b>            | UNICT 5115 CV 250 | <i>B. oleracea</i> var. <i>botrytis</i>                  | CHINA                 | CHINA             |

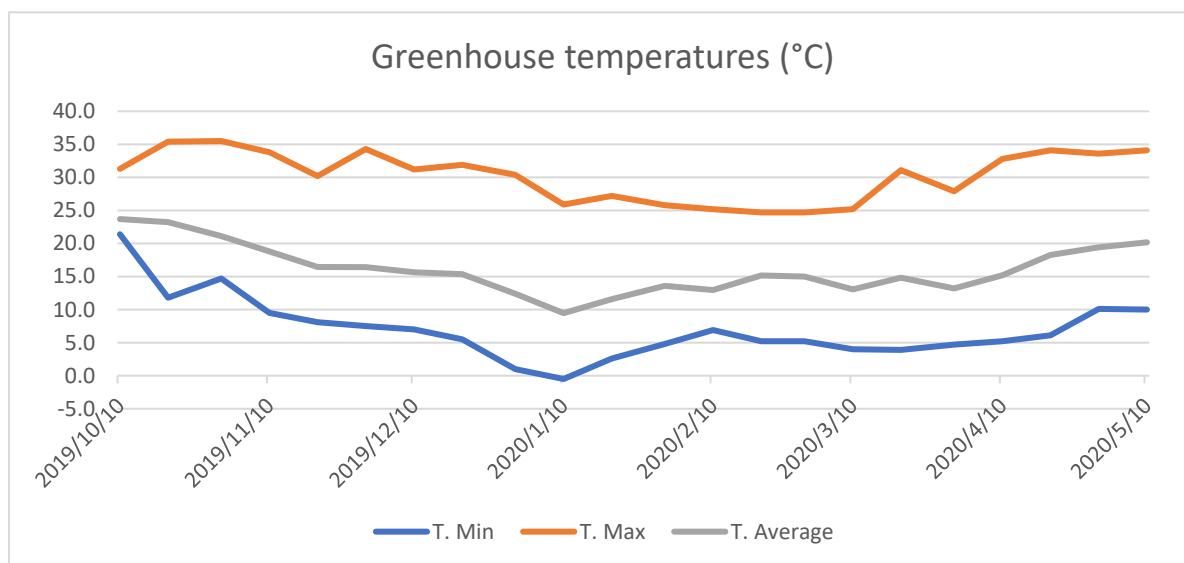

**Supplementary Figure S1.** Maximum, minimum and average temperature of the greenhouse.
